# Supplementary material for: Cancer stem cell markers in breast cancer: pathological, clinical and prognostic significance
Source: Springer Nature journal article supplement (doi:10.1186/bcr3061), 2011-11-23

CD44/CD24

A

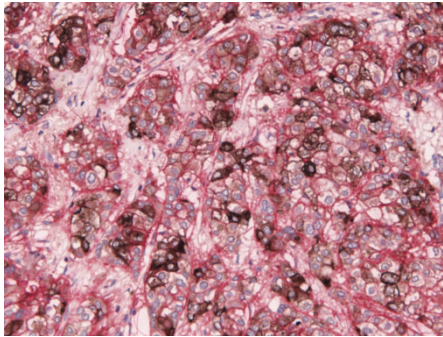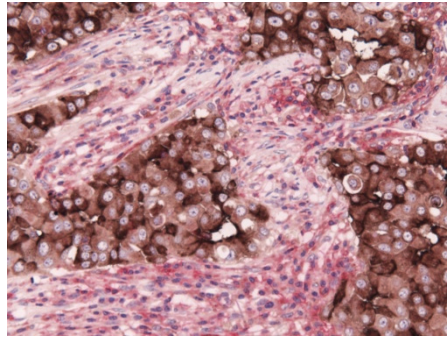

ALDH1A1

B

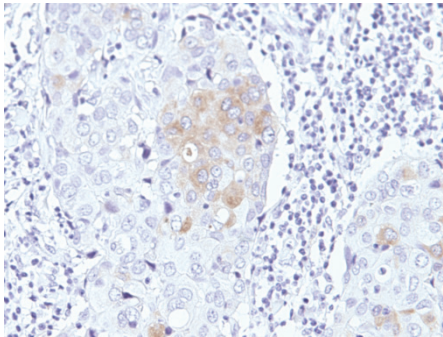

ALDH1A3

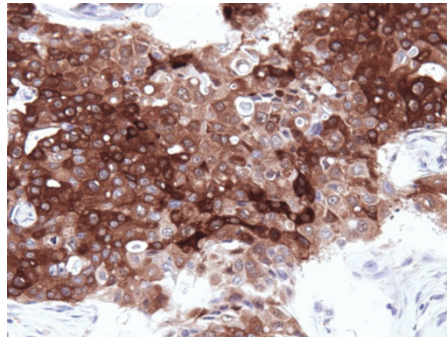

ITGA6

C

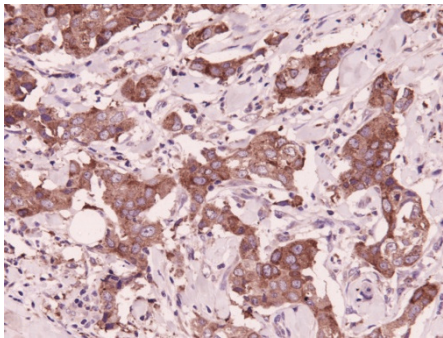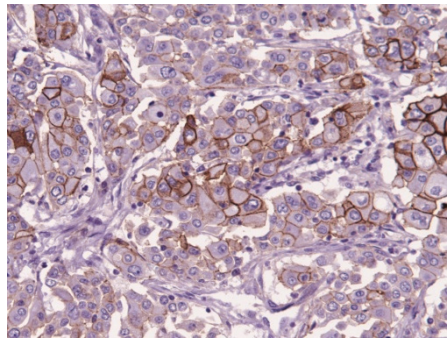

Supplement: 13058_2011_2861_MOESM13_ESM.pdf [file 13058_2011_2861_MOESM13_ESM.pdf]
