# Supplementary material for: Cancer stem cell markers in breast cancer: pathological, clinical and prognostic significance
Source: Springer Nature journal article supplement (doi:10.1186/bcr3061), 2011-11-23

Luminal 1a

Luminal 1b

Luminal 2

HER2

CBP

5NP

ALDH1A1

ITGA6

ALDH1A3

CD44<sup>+</sup>/CD24<sup>-</sup>

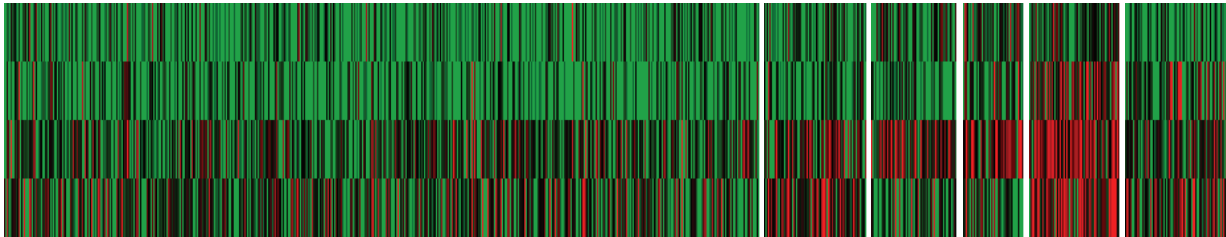

Supplement: 13058_2011_2861_MOESM14_ESM.pdf [file 13058_2011_2861_MOESM14_ESM.pdf]
